# Supplementary figures and images for: Cytotoxic activities of CD8+ T cells collaborate with macrophages to protect against blood-stage murine malaria
Source: eLife journal article supplement (doi:10.7554/elife.04232), 2015-03-11

# Fig.8-figure supplement 1

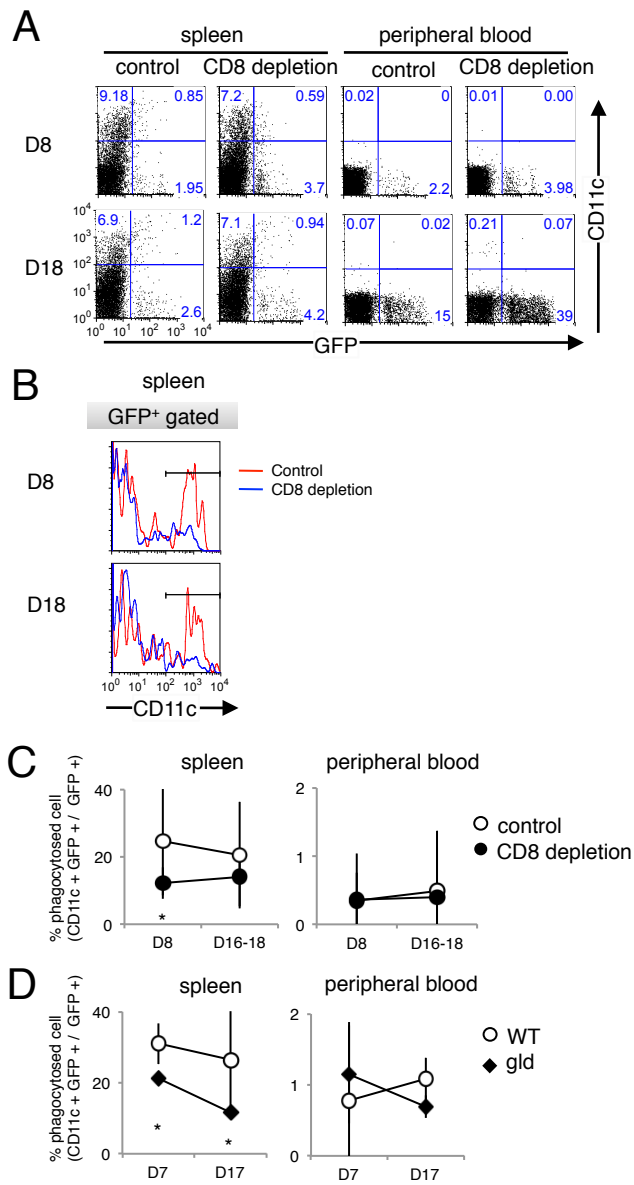

Supplement: supp [file elife-04232-supp-v1.zip]

Fig.1-figure supplement 2

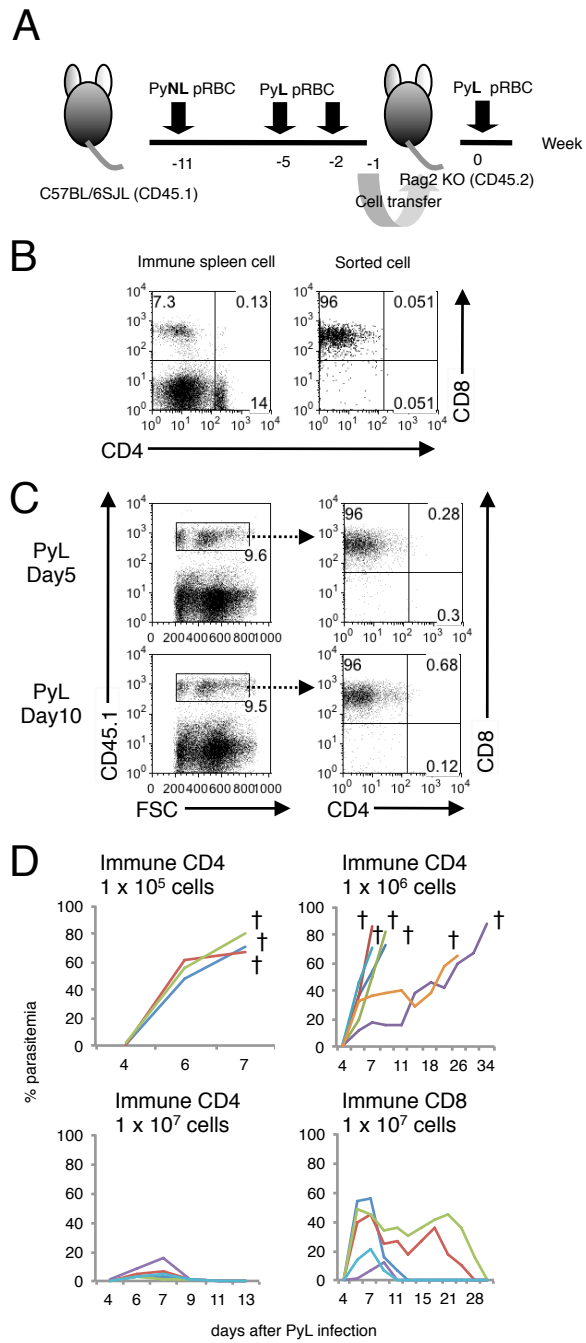

Supplement: supp [file elife-04232-supp-v1.zip]

Fig.1-figure supplement 1

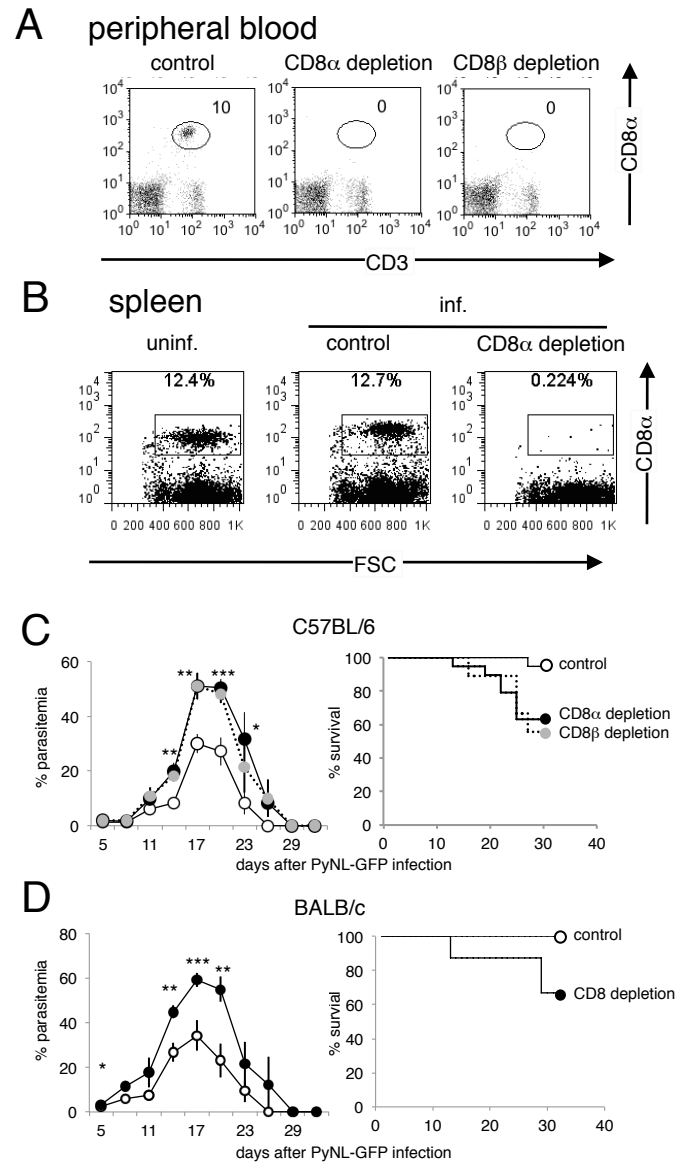

Supplement: supp [file elife-04232-supp-v1.zip]
